# Supplementary material for: Maternal microbiota-derived metabolic profile in fetal murine intestine, brain and placenta
Source: PubMed Central journal article supplement (PMC8819883; doi:10.1186/s12866-022-02457-6), 2022-02-07
Supplement: 12866_2022_2457_MOESM3_ESM.pdf [file 12866_2022_2457_MOESM3_ESM.pdf]

# Health Surveillance Program

## Mouse Facility

Instituto Gulbenkian de Ciência

**Testing laboratories:** IDEXX BioAnalytics  
**Location:** Production, Experimental O, and 1  
**Housing:** IVC and Filter cages  
**Sentinels:** Balb/c  
**Species:** mouse (several strains)

| Agents tested at IGC (mouse) |                       |                |        |                       |               |
|------------------------------|-----------------------|----------------|--------|-----------------------|---------------|
| Production + E0              |                       |                | E1     |                       |               |
| Sample                       | Annual SOPF           | Quarterly SOPF | Sample | Annual SPF            | Quarterly SPF |
| Blood                        | MPV                   | MPV            | Blood  | MPV                   | MPV           |
| Blood                        | MVM                   | MVM            | Blood  | MVM                   | MVM           |
| Blood                        | TMEV                  | TMEV           | Blood  | TMEV                  | TMEV          |
| Blood                        | Pneumocystis murina   | -              | Blood  | -                     | -             |
| Blood                        | MCMV                  | -              | Blood  | MCMV                  | -             |
| Blood                        | Sendai                | -              | Blood  | Sendai                | -             |
| Blood                        | Clostridium piliforme | -              | Blood  | Clostridium piliforme | -             |
| Blood                        | Mycoplasma pulmonis   | -              | Blood  | Mycoplasma pulmonis   | -             |
| Blood                        | Ectromelia            | -              | Blood  | Ectromelia            | -             |
| Blood                        | LCMV                  | -              | Blood  | LCMV                  | -             |
| Blood                        | MAV1                  | -              | Blood  | MAV1                  | -             |
| Blood                        | MAV2                  | -              | Blood  | MAV2                  | -             |
| Blood                        | PVM                   | -              | Blood  | PVM                   | -             |
| Blood                        | REO3                  | -              | Blood  | REO3                  | -             |
|                              | 17 agents             | 6 agents       |        | 16 agents             | 6 agents      |

| Production + E0 |                                          |                                          | E1       |                                          |                                          |
|-----------------|------------------------------------------|------------------------------------------|----------|------------------------------------------|------------------------------------------|
| Sample          | Annual SOPF                              | Quarterly SOPF                           | Sample   | Annual SPF                               | Quarterly SPF                            |
| feces           | Pasteurella pneumotropica biotype Jawetz | Pasteurella pneumotropica biotype Jawetz | feces    | Pasteurella pneumotropica biotype Jawetz | Pasteurella pneumotropica biotype Jawetz |
| feces           | Pasteurella pneumotropica biotype Heyl   | Pasteurella pneumotropica biotype Heyl   | feces    | Pasteurella pneumotropica biotype Heyl   | Pasteurella pneumotropica biotype Heyl   |
| feces           | Streptococcus pneumoniae                 | Streptococcus pneumoniae                 | feces    | Streptococcus pneumoniae                 | Streptococcus pneumoniae                 |
| feces           | Streptococcus sp. B hemolytic (Group A)  | Streptococcus sp. B hemolytic (Group A)  | feces    | Streptococcus sp. B hemolytic (Group A)  | Streptococcus sp. B hemolytic (Group A)  |
| feces           | Streptococcus sp. B hemolytic (Group B)  | Streptococcus sp. B hemolytic (Group B)  | feces    | Streptococcus sp. B hemolytic (Group B)  | Streptococcus sp. B hemolytic (Group B)  |
| feces           | Streptococcus sp. B hemolytic (Group C)  | Streptococcus sp. B hemolytic (Group C)  | feces    | Streptococcus sp. B hemolytic (Group C)  | Streptococcus sp. B hemolytic (Group C)  |
| feces           | Streptococcus sp. B hemolytic (Group G)  | Streptococcus sp. B hemolytic (Group G)  | feces    | Streptococcus sp. B hemolytic (Group G)  | Streptococcus sp. B hemolytic (Group G)  |
| feces           | Helicobacter spp.                        | Helicobacter spp.                        | feces    | Helicobacter spp.                        | Helicobacter spp.                        |
| feces           | (Helicobacter bilis)                     | (Helicobacter bilis)                     | feces    | (Helicobacter bilis)                     | (Helicobacter bilis)                     |
| feces           | (Helicobacter ganmani)                   | (Helicobacter ganmani)                   | feces    | (Helicobacter ganmani)                   | (Helicobacter ganmani)                   |
| feces           | (Helicobacter hepaticus)                 | (Helicobacter hepaticus)                 | feces    | (Helicobacter hepaticus)                 | (Helicobacter hepaticus)                 |
| feces           | (Helicobacter mastomyrinus)              | (Helicobacter mastomyrinus)              | feces    | (Helicobacter mastomyrinus)              | (Helicobacter mastomyrinus)              |
| feces           | (Helicobacter rodentium)                 | (Helicobacter rodentium)                 | feces    | (Helicobacter rodentium)                 | (Helicobacter rodentium)                 |
| feces           | (Helicobacter typhlonius)                | (Helicobacter typhlonius)                | feces    | (Helicobacter typhlonius)                | (Helicobacter typhlonius)                |
| feces           | Giardia muris                            | Giardia muris                            | feces    | Giardia muris                            | Giardia muris                            |
| feces           | Aspiculuris tetraptera                   | Aspiculuris tetraptera                   | feces    | Aspiculuris tetraptera                   | Aspiculuris tetraptera                   |
| feces           | Spironucleus muris                       | Spironucleus muris                       | feces    | Spironucleus muris                       | Spironucleus muris                       |
| feces           | Syphacia muris                           | Syphacia muris                           | feces    | Syphacia muris                           | Syphacia muris                           |
| feces           | Syphacia obvelata                        | Syphacia obvelata                        | feces    | Syphacia obvelata                        | Syphacia obvelata                        |
| feces           | Cryptosporidium spp.                     | Cryptosporidium spp.                     | feces    | Cryptosporidium spp.                     | Cryptosporidium spp.                     |
| feces           | Citrobacter rodentium                    | -                                        | feces    | Citrobacter rodentium                    | -                                        |
| feces           | Salmonella sp.                           | -                                        | feces    | Salmonella sp.                           | -                                        |
| feces           | Streptobacillus moniliformis             | -                                        | feces    | Streptobacillus moniliformis             | -                                        |
| feces           | Corynebacterium kutscheri                | -                                        | feces    | Corynebacterium kutscheri                | -                                        |
| feces           | Bordetella bronchiseptica                | -                                        | feces    | -                                        | -                                        |
| feces           | Proteus mirabilis                        | -                                        | feces    | -                                        | -                                        |
| feces           | Staphylococcus aureus                    | Staphylococcus aureus                    | feces    | -                                        | -                                        |
| feces           | Klebsiella oxytoca                       | Klebsiella oxytoca                       | feces    | -                                        | -                                        |
| feces           | Klebsiella pneumoniae                    | Klebsiella pneumoniae                    | feces    | -                                        | -                                        |
| feces           | Pseudomonas aeruginosa                   | Pseudomonas aeruginosa                   | feces    | -                                        | -                                        |
| feces           | Entamoeba muris                          | Entamoeba muris                          | feces    | -                                        | -                                        |
| feces           | Tritrichomonas muris                     | Tritrichomonas muris                     | feces    | -                                        | -                                        |
| fur swab        | Myocoptes                                | Myocoptes                                | fur swab | Myocoptes                                | Myocoptes                                |
| fur swab        | Radfordia/Myobia                         | Radfordia/Myobia                         | fur swab | Radfordia/Myobia                         | Radfordia/Myobia                         |
| fur swab        | Corynebacterium bovis                    | -                                        | fur swab | -                                        | -                                        |
|                 | 35 agents                                | 28 agents                                |          | 26 agents                                | 22 agents                                |
